# Supplementary material for: Understanding the Behavior of Systems Pharmacology Models Using Mathematical Analysis of Differential Equations: Prolactin Modeling as a Case Study
Source: PubMed Central journal article supplement — CPT Pharmacometrics Syst Pharmacol. 2016 Jul 20;5(7):339–51. doi: 10.1002/psp4.12098 (PMC4961077; doi:10.1002/psp4.12098), 2016-07-20
Supplement: PSP4-5-339-s001.pdf [file PSP4-5-339-s001.pdf]

# A Appendix

## Exercises

### A.1 Exercise 1

Show that the first quadrant  $Q = \{u \geq 0, v \geq 0\}$  is invariant, i.e. orbits that begin in  $Q$  will always remain in  $Q$ .

### A.2 Exercise 2

Show that  $\Gamma_u$  defined by equation 1.8 is an orbit, and (ii) that orbits cannot cross  $\Gamma_u$ .

### A.3 Exercise 3

Show that the regions II and IV are invariant in that, if an orbit starts in II (or IV), then it must stay in II (or IV).

## PK and PD models

### A.4 The Kozielska PK

Kozielska et al., used a bolus dose and a simple drug PK model to simulate drug concentration dynamics in the plasma [24]. The PK model is for subcutaneous dosing with two compartments and is given by

$$\frac{dA_d}{dt} = -k_a A_d, \quad (\text{A.1})$$

$$\frac{dA_c}{dt} = k_a A_d - \frac{CL}{V_1} A_c - \frac{CL_d}{V_1} A_c + \frac{CL_d}{V_2} A_p, \quad (\text{A.2})$$

$$\frac{dA_p}{dt} = \frac{CL_d}{V_1} A_c - \frac{CL_d}{V_2} A_p, \quad (\text{A.3})$$

where  $A_d$  denotes the amount in the depot compartment,  $A_c$  denotes the amount in the central compartment and  $A_p$  denotes the amount in the peripheral compartment. Table 1 gives the values and meaning of various parameters used by Kozielska et al., in the PK model [24].

### A.5 The Stevens PK

$$\frac{dA_c}{dt} = - \left( \frac{CL_1}{V_1} + \frac{Q_1}{V_1} + \frac{Q_2}{V_1} \right) A_c + \frac{Q_1}{V_2} A_p + \frac{Q_2}{V_3} A_b, \quad (\text{A.4})$$

$$\frac{dA_p}{dt} = -\frac{Q_1}{V_2}A_p + \frac{Q_1}{V_1}A_c, \quad (\text{A.5})$$

$$\frac{dA_b}{dt} = -\left(\frac{CL_3}{V_3} + \frac{Q_2}{V_3}\right)A_b + \frac{Q_2}{V_3}A_p, \quad (\text{A.6})$$

where  $A_c$  denotes the amount in the central compartment,  $A_p$  denotes the amount in the peripheral compartment and  $A_b$  denotes the amount in the brain compartment. Table 2 gives the values and meaning of various parameters used by Stevens et al., in the PK model [12].

## A.6 The Stevens PD

The PD model equations are given by (2.5)-(2.6). The estimated parameter values which gave the best fit with the rat data are listed in Table 3.
