# Supplementary material for: Understanding the Behavior of Systems Pharmacology Models Using Mathematical Analysis of Differential Equations: Prolactin Modeling as a Case Study
Source: PubMed Central journal article supplement — CPT Pharmacometrics Syst Pharmacol. 2016 Jul 20;5(7):339–51. doi: 10.1002/psp4.12098 (PMC4961077; doi:10.1002/psp4.12098), 2016-07-20
Supplement: PSP4-5-339-s011.pdf [file PSP4-5-339-s011.pdf]

**Definition:** In this note the region  $V$  in the  $(u, v)$ -plane is the region shown in Figure 6(a): bounded by the two null clines and to the left of  $u = 1$ .

**Lemma 1** *Once the orbit enters the region  $V$ , then eventually,  $v < 0$ .*

**Proof:** Since  $C(t) \rightarrow 0$  very quickly (cf. Figure 5), we assume throughout that  $C = 0$ .

Suppose that at  $\tau = \tau_0$  the orbit has entered the region  $V$  and suppose to the contrary that  $v(\tau) > 0$  for all  $\tau > \tau_0$ . Then, because orbits enter  $V$  from the two null clines:  $\Gamma_u$  above and  $\Gamma_v$  below, the orbit can not leave the region  $V^+$  in  $V$  that lies in the upper half plane  $\{v > 0\}$ .

In  $V$ , and hence in  $V^+$ , the vector field point down and to the left. Therefore

(i)  $v(\tau)$  is a decreasing function. Since it is bounded below it tends to a nonnegative limit, say  $v_\infty$ , and  $dv/d\tau \rightarrow 0$  as  $\tau \rightarrow \infty$ .

(ii)  $u(\tau)$  is also a decreasing function: either it is bounded below, and tends to some limit  $u_\infty < 1$  and  $du/d\tau \rightarrow 0$  as  $\tau \rightarrow \infty$ , or it tends to  $-\infty$ .

If  $u(\tau) \rightarrow u_\infty$ , then the orbit converges to the point  $(u_\infty, v_\infty)$  as  $\tau \rightarrow \infty$  and hence,  $(u_\infty, v_\infty)$  must be an equilibrium point in  $V$  and  $u_\infty < 1$ . However, the system has no such equilibrium points. This implies that  $u(\tau) \rightarrow -\infty$  as  $\tau \rightarrow \infty$ .

It follows from equation (2.10) that, once  $u < 0$ , then, because  $\psi(\tau) > 1$ ,

$$\frac{dv}{d\tau} = \psi(\tau) \cdot u - v < -u$$

Hence  $dv/d\tau \rightarrow -\infty$  as  $\tau \rightarrow \infty$ , which contradicts the observation under (i) that  $dv/d\tau \rightarrow 0$  as  $\tau \rightarrow \infty$ . Therefore the orbit must break through the  $u$ -axis, and  $v$  must become negative in finite time.  $\square$
